# Supplementary material
Source: Springer Nature journal article supplement (https://www.springermedizin.de/resource/supplementary/12958_2014_1257_MOESM1_ESM.pdf/9567168)

**A**

DNA      SS      SS      NS      NS      NN      NN      DNA  
 Marker U    C    U    C    U    C    U    C    U    C    U    C    Marker

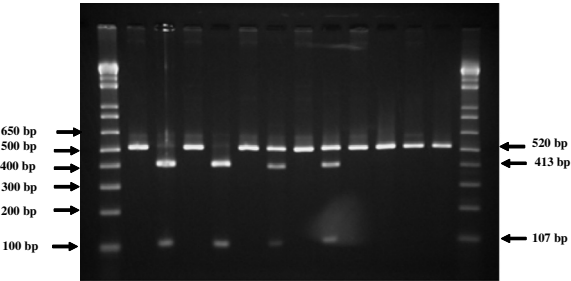**B**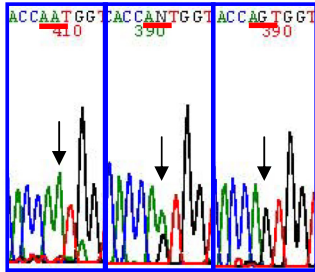

Supplement: MOESM1 [file 9567168]
